# Supplementary material
Source: Springer Nature journal article supplement (https://www.springermedizin.de/resource/supplementary/12936_2007_413_MOESM1_ESM.pdf/9547394)

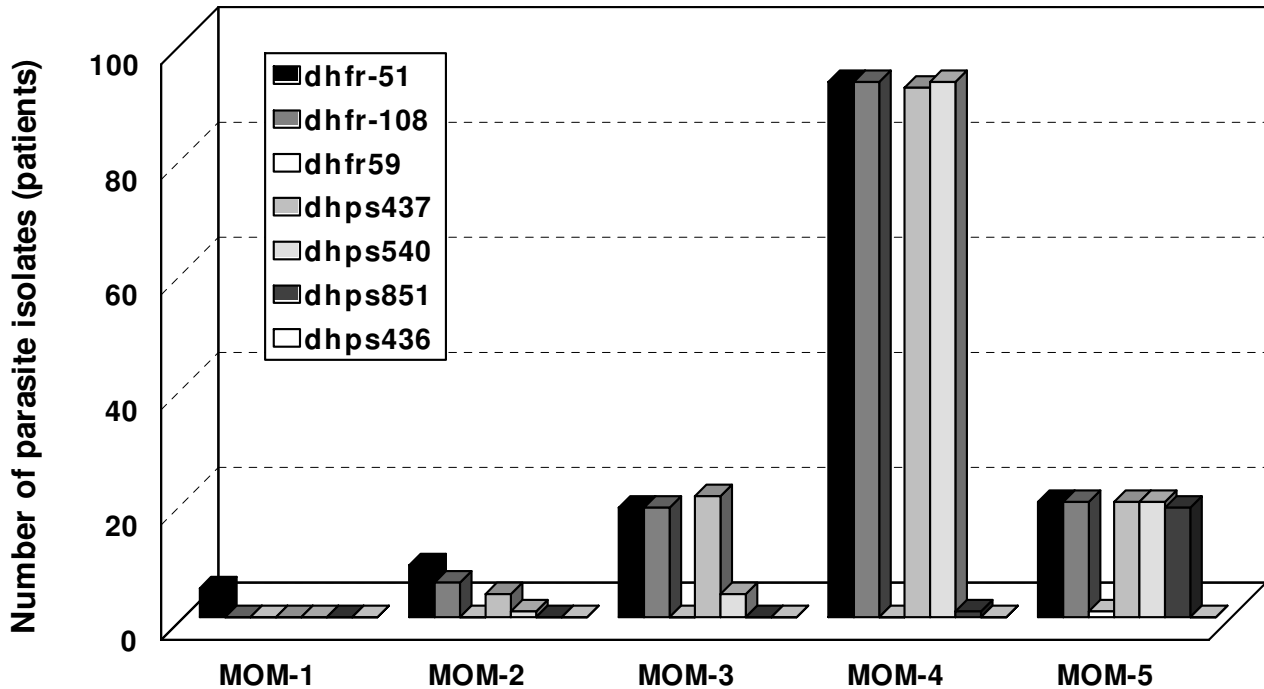

Multiplicity of mutations (MOM), and frequency of individual mutations

Supplement: MOESM1 [file 9547394]
